# Supplementary material for: Comprehensive Analysis of Subtilase Gene Family and Their Responses to Nematode in Trichoderma Harzianum
Source: Preprints.org preprint supplement (doi:10.20944/preprints202010.0403.v1), 2020-10-19

ThSBT1

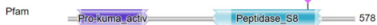

ThSBT2

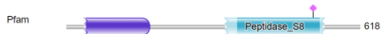

ThSBT3

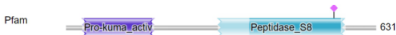

ThSBT4

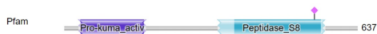

ThSBT5

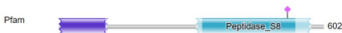

ThSBT6

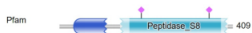

ThSBT7

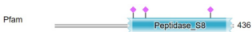

ThSBT8

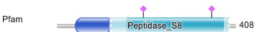

ThSBT9

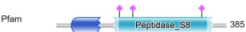

ThSBT10

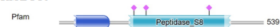

ThSBT11

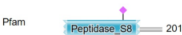

ThSBT12

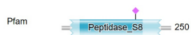

ThSBT13

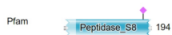

ThSBT14

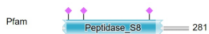

ThSBT15

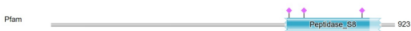

ThSBT16

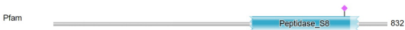

ThSBT17

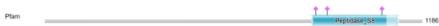

ThSBT18

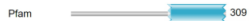

ThSBT19

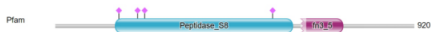

ThSBT20

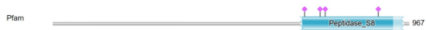

ThSBT21

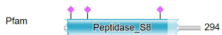

ThSBT22

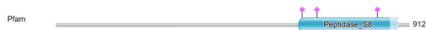

ThSBT23

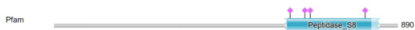

### ThSBT24

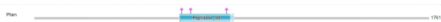

### ThSBT25

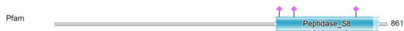

### ThSBT26

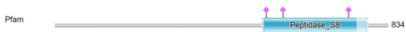

### ThSBT27

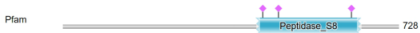

### ThSBT28

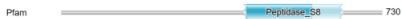

### ThSBT29

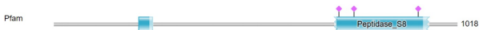

### ThSBT30

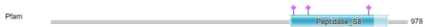

### ThSBT31

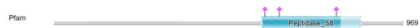

### ThSBT32

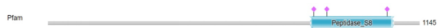

### ThSBT33

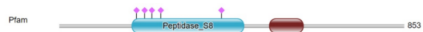

### ThSBT34

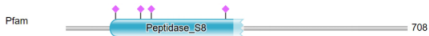

### ThSBT35

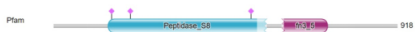

### ThSBT36

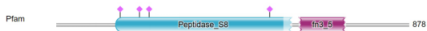

### ThSBT37

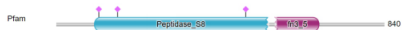

### ThSBT38

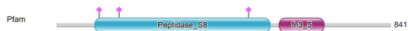

### ThSBT39

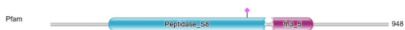

### ThSBT40

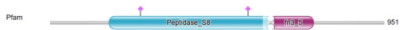

### ThSBT41

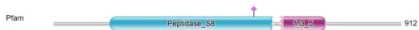

Supplement: Supplementary file 1 [file supplementary]
