# Supplementary material for: Comprehensive Analysis of Subtilase Gene Family and Their Responses to Nematode in Trichoderma Harzianum
Source: Preprints.org preprint supplement (doi:10.20944/preprints202010.0403.v1), 2020-10-19
Supplement: Supplementary file 1 [file Table S1. Details of subtilse genes from Trichoderma guizhouense, Trichoderma virens , Trichoderma reesei ,Trichoderma atroviride.xlsx]

## Sheet: Sheet3
Table S1. Details of subtilse genes from Trichoderma guizhouense, Trichoderma virens , Trichoderma reesei ,Trichoderma atroviride,Trichoderma asperellum,Trichoderma lentiforme,Trichoderma parareesei,Metapochonia rubescens,Purpureocillium lilacinum,Fusarium austroafricanum,Lasiodiplodia theobromae,Colletotrichum simmondsii,Metapochonia rubescens,Zopfia rhizophila.
Name	Gene Identifier	Name	Gene Identifier	Name	Gene Identifier	Name	Gene Identifier	Name	Gene Identifier	Name	Gene Identifier	Name	Gene Identifier	Name	Gene Identifier	Name	Gene Identifier	Name	Gene Identifier
TguSBT1	A0O28_0022720	TvSBT1	TRIVIDRAFT_31861	TreSBT1	TRIREDRAFT_123865	TatSBT2	TRIATDRAFT_188756	TasSBT1	M441DRAFT_416278	Tlesed2	CFAM422_004304	Tapr1a	TARUN_5670	PlSBT9	VFPFJ_05319[Purpureocillium lilacinum]	FaSP11	F53441_12275[Fusarium austroafricanum]	AfSBT21	CNMCM5878_003486 [Aspergillus fumigatiaffinis]
TguSBT2	A0O28_0094310	TvSBT2	TRIVIDRAFT_217176	TreSBT2	TRIREDRAFT_82623	TatSBT3	TRIATDRAFT_145909	TasSBT2	M441DRAFT_196743	TleSBT2	CFAM422_008629	TpSUB3	A9Z42_0063750	PsSBT14	LY89DRAFT_228881 [Phialocephala scopiformis]	FaSBT26	F53441_8557 [Fusarium austroafricanum]	AsSBT23	PHISCL_03794 [Aspergillus sclerotialis]
TguSBT3	A0O28_0039380	TvSBT3	TRIVIDRAFT_87425	TreSBT4	TRIREDRAFT_70962	TatSBT5	TRIATDRAFT_220221	TasSBT3	M441DRAFT_141873	TleSBT3	CFAM422_000565	TpSUB9	A9Z42_0003520	PaSBT18	PV04_08745[Phialophora americana]	FfSBT31	CEP51_006902 [Fusarium floridanum]	BocSBT23	CFAM422_003742 Botrytis cinerea B05.10
TguSBT4	A0O28_0094290	TvSBT5	TRIVIDRAFT_180959	TreSBT5	TRIREDRAFT_111838	TatSBT6	TRIATDRAFT_302419	TasSBT5	M441DRAFT_89557	TleSBT4	CFAM422_008627	TgaSBT7	TGAMA5MH_03512	PsSBT18	V496_05133[Pseudogymnoascus ]	FmSBT32	AYO21_05377 [Fonsecaea monophora]	BycSBT13	CC80DRAFT_589716 [Byssothecium circinans]
TguSBT5	A0O28_0078360	TvSBT6	TRIVIDRAFT_77334	TreSBT6	TRIREDRAFT_121495	TatSBT7	KJ740359.1	TasSBT6	M441DRAFT_166201	TleSBT5	CFAM422_013032	TcSBT9	BBK36DRAFT_1136502	PpSBT18	PENPOL_c007G01542 [Penicillium polonicum]	FoSBT32	FOPG_14341 [Fusarium oxysporum]	CfSBT18	CGGC5_v011364[Colletotrichum fructicola]
TguSBT6	A0O28_0046030	TvSBT7	TRIVIDRAFT_143434	TreSBT7	M419DRAFT_100677	TatSBT10	TRIATDRAFT_291037	TasSBT8	M441DRAFT_145850	TleSBT7	CFAM422_003987	TarSBT12	TARUN_3636	PsSBT20	PENOC_053890 [Penicillium sp. 'occitanis']	FaSBT35	CDV31_001661 [Fusarium ambrosium]	CiSBT21	PV07_10257 [Cladophialophora immunda]
TguSUB2	A0O28_0003910	TvSBT8	TRIVIDRAFT_33902	TreSBT8	M419DRAFT_39623	TatSBT12	TRIATDRAFT_195817	TasSBT10	M441DRAFT_62460	TleSBT8	CFAM422_010551	TgaSBT15	TGAMA5MH_01487	PsSBT21	PAC_02867 [Phialocephala subalpina]	FfSBT26	FFB14_04838[Fusarium fujikuroi]	CogSBT22	GCG54_00000471 [Colletotrichum gloeosporioides]
TguSUB9	A0O28_0081090	TvSBT9	TRIVIDRAFT_88460	TreSBT9	TRIREDRAFT_123234	TatSBT13	TRIATDRAFT_322237	TasSBT11	M441DRAFT_129162	TleSBT9	CFAM422_004864	TgaSBT17	TGAM01_v205785	PlSBT21	PCL_00505 [Purpureocillium lilacinum]	FsSBT26	FSPOR_4333 [Fusarium sporotrichioides]	CocSBT24	BP5796_04016 [Coleophoma crateriformis]
TguSub8	A0O28_0080620	TvSBT10	TRIVIDRAFT_82892	TreSBT15	M419DRAFT_91684	TatSBT16	TRIATDRAFT_149048	TasSBT12	M441DRAFT_54706	TleSpm1	CFAM422_004909	TarSBT18	TARUN_2497	PfiSBT22	PFICI_14070 [Pestalotiopsis fici]	FpSBT26	FPSE_06783 [Fusarium pseudograminearum]	ComSBT24	CCM_03558 [Cordyceps militaris CM01]
TguSBT13	A0O28_0012660	TvSBT11	TRIVIDRAFT_153851	TreSBT34	TRIREDRAFT_60791	TatSBT17	TRIATDRAFT_172115	TasSBT14	M441DRAFT_71677	TleSBT11	CFAM422_009246	TarSBT19	TARUN_8444	PlSBT22	VFPBJ_07877[Purpureocillium lilacinum]	FaSBT36	FALBO_5992 [Fusarium albosuccineum]	Co2T2.1	GE09DRAFT_28912[Coniochaeta sp. 2T2.1]
TguSBT15	A0O28_0005420	TvSBT12	TRIVIDRAFT_153866	TreSBT37	M419DRAFT_33088	TatSBT19	TRIATDRAFT_288311	TasSBT19	M441DRAFT_69421	TleSBT12	CFAM422_009767	TgaSBT19	TGAMA5MH_04738	PlSBT23	VFPFJ_07969 [Purpureocillium lilacinum]	Mr P32	ADK74313.2 [Metapochonia rubescens]	CiSBT35	CI238_12412 [Colletotrichum incanum]
TguSBT16	A0O28_0092920	TvSBT15	TRIVIDRAFT_123162	TreSBT38	TRIREDRAFT_35726	TatSBT22	TRIATDRAFT_90782	TasSBT21	M441DRAFT_408147	TleSBT13	CFAM422_005380	TaSBT20	BHQ10_008546 [Talaromyces amestolkiae]	PecSBT23	PCAMFM013_S001g000939 [Penicillium camemberti]	LtSBT13	LTHEOB_5184 [Lasiodiplodia theobromae]	CsSBT35	CSIM01_05652 [Colletotrichum simmondsii]
TguSBT17	A0O28_0063140	TvSBT16	TRIVIDRAFT_195992	TreSBT39	TRIREDRAFT_109276	TatSBT23	TRIATDRAFT_287414	TasSBT27	M441DRAFT_57074	TleSBT14	CFAM422_011799	ToSBT20	TOPH_07646[Tolypocladium ophioglossoides ]	PeeSBT24	PEX1_083220 [Penicillium expansum]	LpSBT21	K432DRAFT_260410[Lepidopterella palustris ]	ChSBT35	CH63R_06789 [Colletotrichum higginsianum ]
TguSBT19	A0O28_0020790	TvSBT19	TRIVIDRAFT_189569			TatSBT27	TRIATDRAFT_53902	TasSBT28	M441DRAFT_57074	TleSBT15	CFAM422_006867	TarSBT23	TARUN_8912	PnSBT25	ACN38_g8418 Penicillium nordicum	LpSBT20	K432DRAFT_437913[Lepidopterella palustris]	ChSBT35	CH063_04288 [Colletotrichum higginsianum]
TguSBT21	A0O28_0020360	TvSBT25	TRIVIDRAFT_70009			TatSBT33	TRIATDRAFT_143106	TasSBT32	M441DRAFT_49925	TleSBT16	CFAM422_008456	ToSBT25	Tolypocladium ophioglossoides	PmSBT29	UCRPA7_411 [Phaeoacremonium minimum]	LfSBT13	K458DRAFT_143847 [Lentithecium fluviatile ]	CkSBT21	E8E13_003632 [Curvularia kusanoi]
TguSBT24	A0O28_0089510	TvSBT27	TRIVIDRAFT_70443			TatSBT34	TRIATDRAFT_35490	TasSBT33	M441DRAFT_80278	TleSBT19	CFAM422_004527	TgaSBT29	TGAM01_v208589	PpSBT31	PENPOL_c007G01542 [Penicillium polonicum]	LmSBT14	K491DRAFT_716255[Lophiostoma macrostomum]	EgSBT14	Egran_06668[Elaphomyces granulatus]
TguSBT25	A0O28_0060870	TvSBT32	TRIREDRAFT_103073			TatSBT36	TRIATDRAFT_321810	TasSBT34	M441DRAFT_77716	TleSBT21	CFAM422_009594	TpSBT31	BU26DRAFT_502828 [Trematosphaeria pertusa]	PfSBT31	PFICI_08747 [Pestalotiopsis fici ]	MpSBT13	BDV95DRAFT_574246 [Massariosphaeria phaeospora]	DcSBT20	GL218_07452[Daldinia childiae]
TguSBT26	A0O28_0072510	TvSBT33	TRIVIDRAFT_11141			TatSBT37	TRIATDRAFT_227276	TasSBT36	M441DRAFT_52792	TleSBT23	CFAM422_003742	TarSBT39	TARUN_7561	PsSBT22	V491_01047 [Pseudogymnoascus ]	MbrSBT14	MBR_01044 [Metarhizium brunneum]	EnSBT21	B5807_11048 [Epicoccum nigrum]
TguSBT27	A0O28_0111720	TvSBT34	TRIVIDRAFT_37325			TatSBT40	TRIATDRAFT_89596	TasSBT38	M441DRAFT_64586	TleSBT24	CFAM422_008793	TgaSBT40	TGAM01_v202982			MeaSBT22	MAN_10200[Metarhizium anisopliae]	HbSBT18	K444DRAFT_667907 [Hyaloscypha bicolor E]
TguSBT29	A0O28_0040650	TvSBT35	TRIVIDRAFT_123209			TatSBT41	TRIATDRAFT_20695	TasSBT39	M441DRAFT_47197	TleSBT25	CFAM422_003849	TgaSBT41	TGAM01_v203931			MoSBT17	DL771_000686 [Monosporascus sp.]	HvSBT20	L207DRAFT_636113[Hyaloscypha variabilis F]
TguSBT30	A0O28_0107630	TvSBT36	TRIVIDRAFT_230947					TasSBT40	M441DRAFT_47197	TleSBT26	CFAM422_001590					MerSBT14	MAA_00006 [Metarhizium robertsii ]	HsSBT22	M434DRAFT_397492[Hypoxylon sp. CO27-5]
TguSBT32	A0O28_0061860	TvSBT37	TRIVIDRAFT_123060					TasSBT41	M441DRAFT_459864	TleSBT27	CFAM422_012935					MerSBT30	MGU_11222 [Metarhizium guizhouense ]	VeSBT21	BP5553_04971 [Venustampulla echinocandica]
TguSBT33	A0O28_0024600	TvSBT38	TRIVIDRAFT_29732							TleSBT28	CFAM422_012935					MerSBT31	MAA_04399[Metarhizium robertsii]	NdSBT35	AK830_g7372 [Neonectria ditissima]
TguSBT34	A0O28_0059570	TvSBT39	TRIVIDRAFT_69939							TleSBT29	CFAM422_000409					MeaSBT30	MANI_025459 [Metarhizium anisopliae]	RnSBT18	SAMD00023353_3400320 [Rosellinia necatrix]
TguSBT35	A0O28_0106470									TleSBT30	CFAM422_010326							RmSBT24	Z518_03914 [Rhinocladiella mackenziei]
TguSBT36	A0O28_0084860									TleSBT32	CFAM422_003729							SlSBT20	B7463_g889 [Scytalidium lignicola]
TguSBT37	A0O28_0085150									TleSBT33	CFAM422_004087							OmSBT3	OIDMADRAFT_35856 [Oidiodendron maius Zn]
TguSBT38	A0O28_0019110									TleSBT34	CFAM422_011700							XgSBT14	EKO27_g3794[Xylaria grammica]
TguSBT39	A0O28_0065620									TleSBT35	CFAM422_001863							ZrSBT21	K469DRAFT_38037[Zopfia rhizophila ]
TguSBT40	A0O28_0007570									TleSBT36	CFAM422_003110							ZrSBT11	K469DRAFT_301249[Zopfia rhizophila ]
TguSBT41	A0O28_0106020									TleSBT37	CFAM422_003067
										TleSBT38	CFAM422_009760
										TleSBT39	CFAM422_003298
										TleSBT40	CFAM422_006633
										TleSBT41	CFAM422_001807
