# Supplementary material for: Comprehensive Analysis of Subtilase Gene Family and Their Responses to Nematode in Trichoderma Harzianum
Source: Preprints.org preprint supplement (doi:10.20944/preprints202010.0403.v1), 2020-10-19
Supplement: Supplementary file 2 [file Table S2. Details of CDS message of subtilase genes in Trichoderma harzianum.xlsx]

## Sheet: Sheet1
Gene_name	CDS length	CDS	intron	upstream	downsteam
ThSBT1	1..1737	5	4
ThSBT2	1..1857	4	3
ThSBT3	141..2036	5	4	1
ThSBT4	1..1914	5	4		1
ThSBT5	37..1845	2	1		1
ThSBT6	47..1276	3	2	1	1
ThSBT7	1..1302	4	3
ThSBT8	1..1227	3	2		1
ThSBT9	19..1161	3	2	1	1
ThSBT10	242..1861	2	1	1	1
ThSBT11	1..606	2	1
ThSBT12	1..750	2	1
ThSBT13	1..582	2	1
ThSBT14	1..846	2	1
ThSBT15	1..2772	5	4
ThSBT16	86..2584	7	6	1
ThSBT17	1..3561	4	3
ThSBT18	1..930	5	4
ThSBT19	1..2763	2	1
ThSBT20	1..2904	3	2
ThSBT21	1..885	3	2
ThSBT22	98..2836	3	2	1	1
ThSBT23	1..2673	4	3
ThSBT24	1..5286	7	6		1
ThSBT25	1..2586	4	3
ThSBT26	1..2505	6	5
ThSBT27	1..2187	3	2
ThSBT28	1..2193	3	2
ThSBT29	61..3117	4	3	1	1
ThSBT30	1..2937	7	6
ThSBT31	1..2910	5	4
ThSBT32	203..3640	5	4	1	1
ThSBT33	1..2562	3	2
ThSBT34	1..2127	11	10
ThSBT35	101..2857	6	5	1
ThSBT36	1..2637	3	2
ThSBT37	1..2523	2	1		1
ThSBT38	1..2526	2	1
ThSBT39	1..2847	2	1
ThSBT40	1..2856	2	1
ThSBT41	1..2739	4	3		1
