# Supplementary material for: Comprehensive Analysis of Subtilase Gene Family and Their Responses to Nematode in Trichoderma Harzianum
Source: Preprints.org preprint supplement (doi:10.20944/preprints202010.0403.v1), 2020-10-19
Supplement: Supplementary file 3 [file Table S3. Details of protein site message of subtilase genes in Trichoderma harzianum.xlsx]

## Sheet: protein site
No.	Site
	D		H		S	Length
ThSBT1					S483	578
ThSBT2					S518	618
ThSBT3					S545	631
ThSBT4					S543	637
ThSBT5					S519	602
ThSBT6			H196		S353	409
ThSBT7	D190		H221		S379	436
ThSBT8			H197		S353	408
ThSBT9	D142		H173		S328	385
ThSBT10	D196		H228		S394	539
ThSBT11					S121	201
ThSBT12					S169	250
ThSBT13					S174	194
ThSBT14	D12		H47		S192	281
ThSBT15	D638		H679		S835	923
ThSBT16					S725	832
ThSBT17	D850		H857		S1059	1186
ThSBT18						309
ThSBT19	D163		H211	D228	S557	920
ThSBT20	D683		H724	D738	S883	967
ThSBT21	D15		H50		S206	294
ThSBT22	D635		H673		S825	912
ThSBT23	D610		H648	D662	S804	890
ThSBT24	D657		H696		S857	1761
ThSBT25	D581		H619		S778	861
ThSBT26	D528		H571		S734	834
ThSBT27	D432		H467		S625	728
ThSBT28						730
ThSBT29	D710		H757		S918	1018
ThSBT30	D664		H705		S871	978
ThSBT31	D584		H624		S783	969
ThSBT32	D819		H858		S1044	1145
ThSBT33	D190	D211	H228	D251	S400	853
ThSBT34	D102		H155	D176	S331	708
ThSBT35	D155		H205		S527	918
ThSBT36						878
ThSBT37	D108		H157		S485	840
ThSBT38	D106		H157		S483	841
ThSBT39					S551	948
ThSBT40	D256				S563	951
ThSBT41					S524	912
