# Supplementary material for: Comprehensive Analysis of Subtilase Gene Family and Their Responses to Nematode in Trichoderma Harzianum
Source: Preprints.org preprint supplement (doi:10.20944/preprints202010.0403.v1), 2020-10-19
Supplement: Supplementary file 4 [file Table S4. Detailed information of the 19 motifs in the subtilase proteins of Trichoderma harzianume.xlsx]

## Sheet: Sheet1
Table S3. Detailed information for the 19 motifs in the subtilase proteins of Trichoderma harzianum.
Motif	Best possible match	Length	Description
1	VISGTSMATPYIAGCYALVK	20	Subtilase family
2	DEIGHGTHALGLLLK	15
3	WAISRNVDIISMSFA	15
4	VKVAVIDTGIDYTHP	15	Subtilase family
5	VAPEASLYAYRIFGC	15
6	GVVVTISAGNEG	12
7	FPARHSSVISIYAANCRGTF	20
8	GPTIEMTLHPKVASPGGTILSTWPLAAGG	29
9	LGGGFGPGYKISFGYALVGDD	21
10	SISYGEGEIDVPKNYFLRQCNEWLKLGLQ	29
11	SSGGFSYHFSRPWYQEEAVGNYLKNHIS	28
12	SRLKGWKDHVD	11
13	GTNTPMPSPDP	11
14	CYQPAWDAAANATVDWNTTILLVSWEDNCGTGW	33
15	QFPQLSVDEILVSLQTTARPTPWIWNTSM	29
16	NQTLFVYTPGAYPFPNITLPVWAVTPEFTTDGSYGACNPLNDKAPADLSN	50
17	LNLSTLGENIKIRWP	15
18	EHGGIYNRAGRGIPDISANGAHFR	24
19	HPEFEGRATFLRT	13
